# Supplementary material for: Phylogenetic position of Loricifera inferred from nearly complete 18S and 28S rRNA gene sequences
Source: PubMed Central journal article supplement (PMC4657359; doi:10.1186/s40851-015-0017-0), 2015-06-30

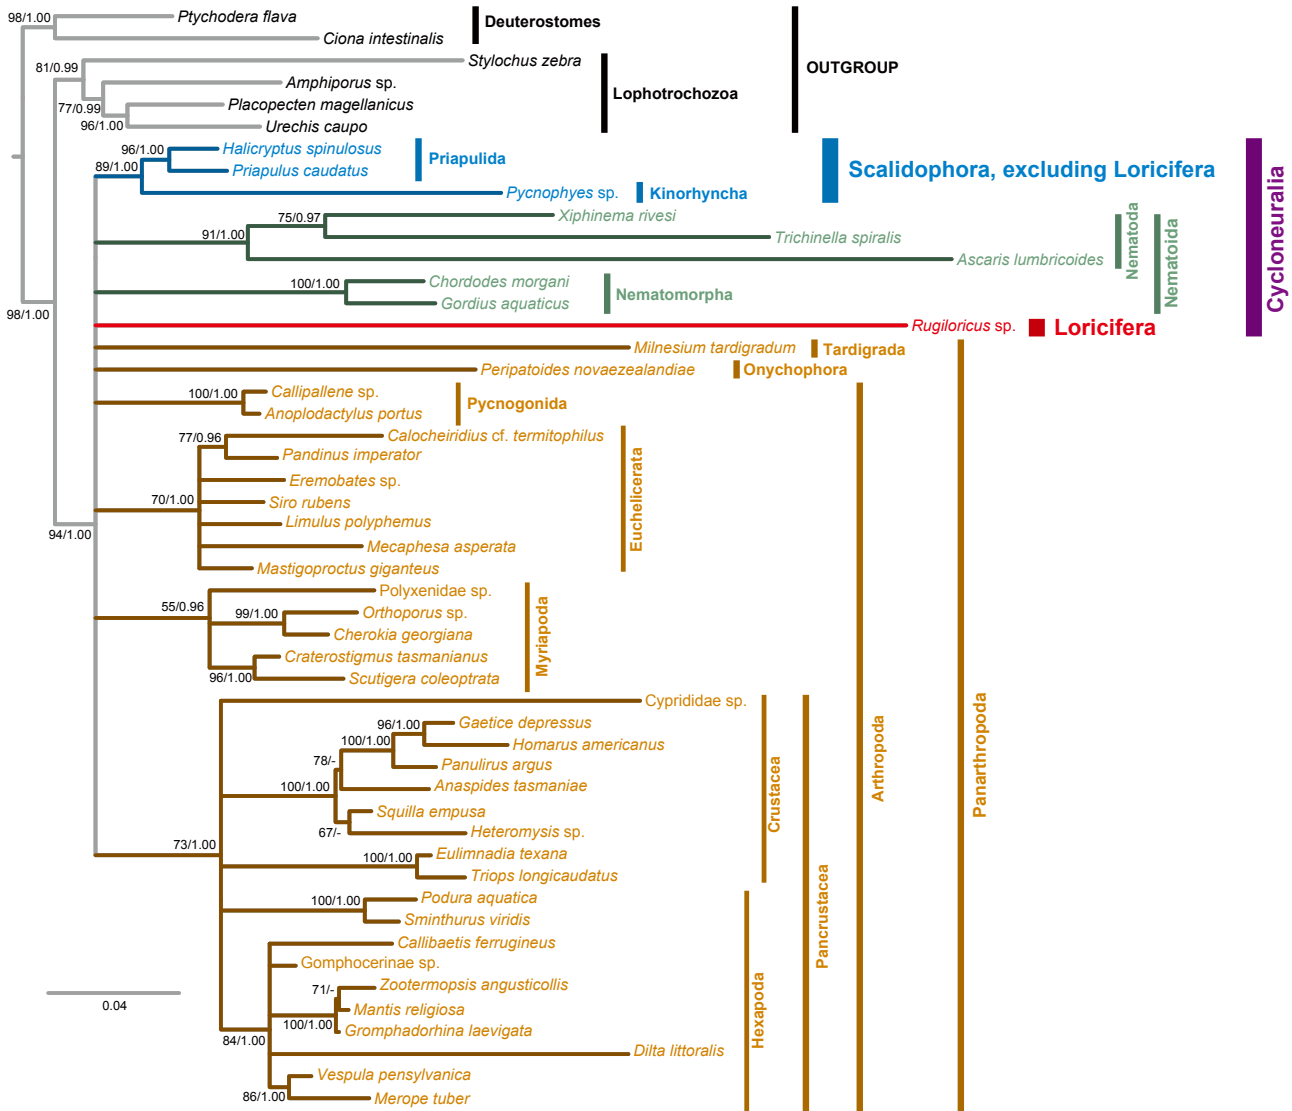

Supplement: 40851_2015_17_MOESM9_ESM.pdf [file 40851_2015_17_MOESM9_ESM.pdf]
